# Supplementary material
Source: MDPI journal article supplement (https://www.mdpi.com/1424-2818/12/2/53)
Supplement: s1 [file s1]

**Table S1.** Pearson correlation coefficients ( $r$ ) and correlations ( $R^2$ ) between environmental variables and the NMS ordination axes. Variables strongly correlated with each axis ( $R^2 > 0.3$ ) are in bold. Total cumulative  $R^2$  of the ordination is given as CUM  $R^2$ . CTD variables were values at 30 m depth and the maximum, minimum, average, 2 m depth and sum (for fluorescence only) in the water column, along with year, month, station, and total crustacean prey density.

| CUM $R^2 = 0.89$        |                | Axis 1         |             | Axis 2         |             | Axis 3         |       |
|-------------------------|----------------|----------------|-------------|----------------|-------------|----------------|-------|
|                         |                | $(R^2 = 0.61)$ |             | $(R^2 = 0.15)$ |             | $(R^2 = 0.14)$ |       |
|                         |                | $r$            | $R^2$       | $r$            | $R^2$       | $r$            | $R^2$ |
| Year                    |                | 0.21           | 0.05        | -0.41          | 0.17        | 0.24           | 0.06  |
| Month                   |                | 0.06           | 0           | -0.3           | 0.09        | -0.38          | 0.14  |
| <b>Station</b>          |                | <b>0.57</b>    | <b>0.33</b> | 0.16           | 0.03        | 0              | 0     |
| Crustacean prey density |                | -0.04          | 0           | -0.46          | 0.21        | 0.31           | 0.1   |
| Temperature             | <i>minimum</i> | 0.21           | 0.04        | -0.53          | 0.28        | 0.15           | 0.02  |
| (°C)                    | <i>maximum</i> | -0.29          | 0.09        | 0.08           | 0.01        | 0.36           | 0.13  |
|                         | <i>average</i> | 0.03           | 0           | <b>-0.6</b>    | <b>0.37</b> | 0.35           | 0.12  |
|                         | <i>30 m</i>    | 0.05           | 0           | -0.45          | 0.21        | 0.07           | 0.01  |
| Salinity                | <i>minimum</i> | 0.03           | 0           | -0.35          | 0.12        | 0.18           | 0.03  |
| (PSU)                   | <i>maximum</i> | -0.15          | 0.02        | -0.35          | 0.12        | -0.27          | 0.08  |
|                         | <i>average</i> | -0.05          | 0           | -0.3           | 0.09        | -0.25          | 0.06  |
|                         | <i>30 m</i>    | 0.22           | 0.05        | -0.53          | 0.28        | -0.11          | 0.01  |
| Dissolved oxygen        | <i>minimum</i> | -0.37          | 0.14        | 0.03           | 0           | 0.22           | 0.05  |
| (mg L <sup>-1</sup> )   | <i>maximum</i> | -0.1           | 0.01        | 0.31           | 0.1         | 0.26           | 0.07  |
|                         | <i>average</i> | -0.3           | 0.09        | 0.03           | 0           | 0.39           | 0.15  |
|                         | <i>30 m</i>    | -0.49          | 0.24        | 0.21           | 0.04        | 0.07           | 0.01  |
| Density                 | <i>minimum</i> | 0.12           | 0.02        | -0.32          | 0.1         | 0.03           | 0     |
| (kg m <sup>-3</sup> )   | <i>maximum</i> | -0.3           | 0.09        | -0.14          | 0.02        | -0.36          | 0.13  |
|                         | <i>average</i> | -0.05          | 0           | -0.1           | 0.01        | -0.38          | 0.15  |
|                         | <i>30 m</i>    | 0.27           | 0.07        | -0.49          | 0.24        | -0.18          | 0.03  |
| Fluorescence            | <i>minimum</i> | 0.29           | 0.08        | 0.07           | 0           | 0.17           | 0.03  |
| (mg m <sup>-3</sup> )   | <i>maximum</i> | 0.35           | 0.12        | 0.17           | 0.03        | -0.13          | 0.02  |
|                         | <i>average</i> | 0.43           | 0.18        | -0.1           | 0.01        | 0.28           | 0.08  |
|                         | <i>2 m</i>     | 0.21           | 0.05        | -0.34          | 0.11        | -0.05          | 0     |
|                         | <i>30 m</i>    | 0.24           | 0.06        | -0.07          | 0           | 0.27           | 0.07  |
|                         | <i>sum</i>     | 0.38           | 0.14        | 0              | 0           | 0.25           | 0.06  |



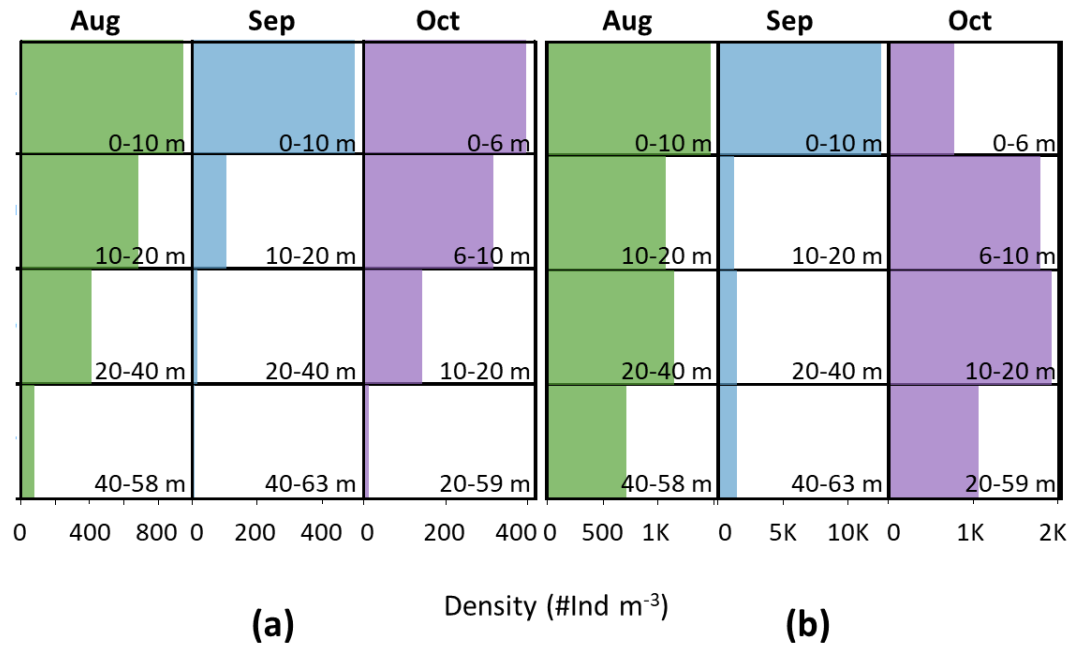

**Figure S2.** Vertical distributions (Ind m<sup>-3</sup>) of (a) mesoplankton jellyfish and (b) crustacean zooplankton prey at Union during hypoxic conditions in August-October, 2013. Note the different x-axis scales and different depth range of net tows each month.

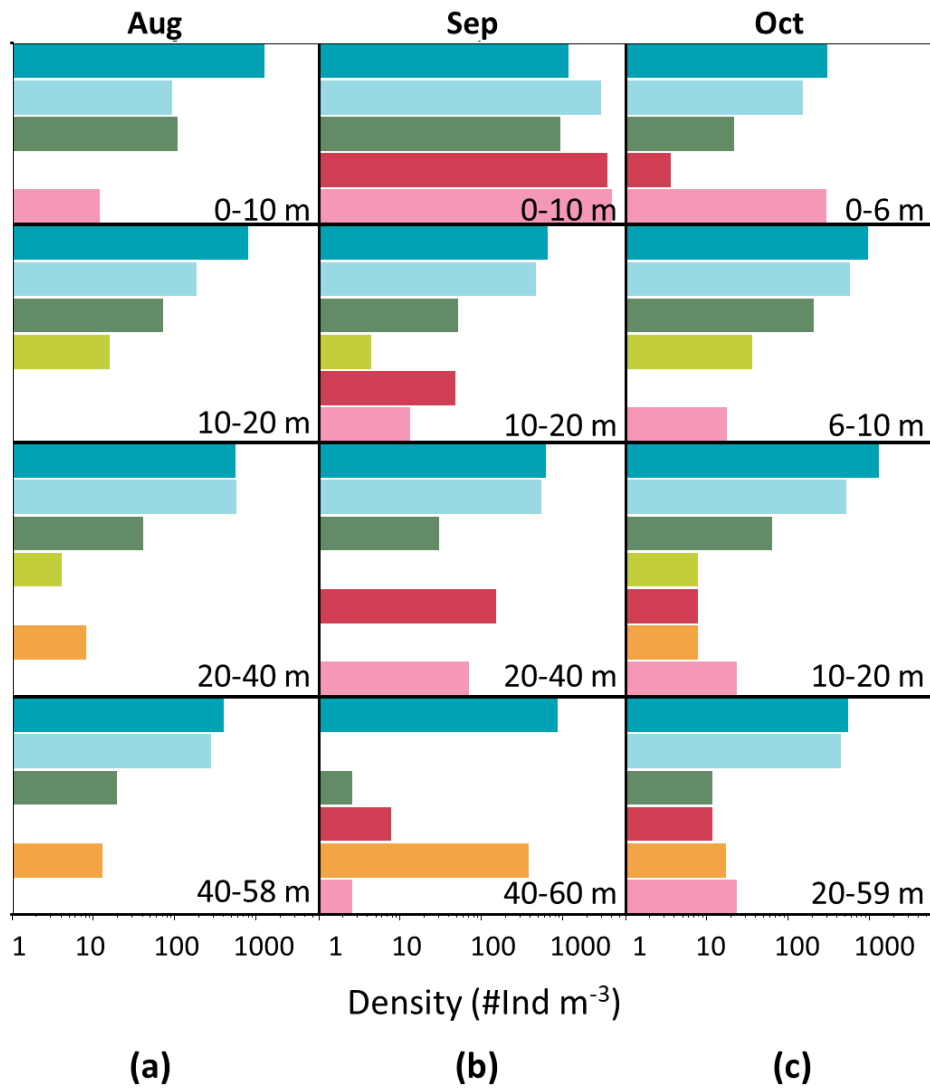

**Figure S3.** Daytime vertical distribution (Ind  $m^{-3}$ ) of abundant crustacean prey taxa—four orders of copepods, euphausiid early life stages, and other crustaceans—during the 2013 hypoxic events at Union in (a) August, (b) September, and (c) October. Depth range sampled by each net is indicated in each panel. Note the log scaling of x-axes.
